# Supplementary material
Source: PubMed Central journal article supplement (PMC5573186)
Supplement: NIHMS852608-supplement-Appendix_A.pdf [file NIHMS852608-supplement-Appendix_A.pdf]

**Appendix A.** Score test measures collected electronically for each patient in the Center for Brain Health.

|                                                                                               |
|-----------------------------------------------------------------------------------------------|
| The PREDIMED Mediterranean diet questionnaire (PREDIMED) <sup>[e1]</sup>                      |
| Center for Epidemiologic Studies Depression scale (CES-D) <sup>[e2]</sup>                     |
| Generalized Anxiety Disorder 7-item scale (GAD-7) <sup>[e3]</sup>                             |
| Insomnia Severity Index (ISI) <sup>[e4]</sup>                                                 |
| 9-hole peg test (dominant and non-dominant hands) <sup>[e5]</sup>                             |
| Timed 25-foot walking test (25-ft walk)                                                       |
| Short Test of Mental Status (STMS) <sup>[e6]</sup>                                            |
| Unified Parkinson's Disease Rating Scale-Motor (UPDRS) <sup>[e7]</sup>                        |
| AD-8 (The Eight-Item Informant Interview to Differentiate Aging and Dementia) <sup>[e8]</sup> |
| Parkinsonism screening questionnaire (PARK) <sup>[e9]</sup>                                   |
| Brain Health Readiness Assessment (Readiness)                                                 |
| Brain Health Quiz (BHQ)                                                                       |

- [e1] Martínez-González MA, García-Arellano A, Toledo E, Salas-Salvadó J, Buil-Cosiales P, Corella D, et al. A 14-item Mediterranean diet assessment tool and obesity indexes among high-risk subjects: the PREDIMED trial. *PLoS One* 2012;7:e43134.
- [e2] Radloff, L. The CES-D Scale: A self-report depression scale for research in the general population. *Applied Psychological Measurement* 1977;1:385-401.
- [e3] Spitzer RL, Kroenke K, Williams JB, Löwe B. A brief measure for assessing generalized anxiety disorder: the GAD-7. *Arch Intern Med* 2006;166:1092-1097.
- [e4] Bastien C, Vallières A, Morin C. Validation of the Insomnia Severity Index as an outcome for insomnia research. *Sleep Med* 2001;2:297-307.
- [e5] Mathiowetz V, Weber K, Kashman N, Volland G. Adult norms for the nine hole peg test of finger dexterity. *Occupational Therapy Journal of Research* 1985;5:24-38.
- [e6] Kokmen E, Naessens JM, Offord KP. A short test of mental status: description and preliminary results. *Mayo Clin Proc* 1987;62:281-8.
- [e7] Fahn et al. The unified Parkinson's disease rating scale. In: Fahn S, Marsden CD, Calne DB, Goldstein M, eds. *Recent developments in Parkinson's disease*. Florham Park, NJ: Macmillan (1987) vol. 2 pp. 153-63, 293-304.
- [e8] Galvin JE, Roe CM, Powlishta KK, Coats MA, Muich SJ, Grant E, et al. The AD8: a brief informant interview to detect dementia. *Neurology*. 2005 Aug 23;65(4):559-64.
- [e9] Rocca WA, Maraganore DM, McDonnell SK, Schaid DJ. Validation of a telephone questionnaire for Parkinson's disease. *J Clin Epidemiol* 1998;51:517-23.
